# Supplementary material for: Efficacy of Neoadjuvant Targeted Therapy in Treatment of Patients with Localised Clear-Cell Renal Cell Carcinoma
Source: Hindawi journal article supplement (doi:10.1155/2021/6674637), 2021-04-30
Supplement: f1 [file 6674637.f1.zip]

Table 4 - Evaluation of objective response according to RECIST 1.1 in localized RCC after neoadjuvant targeted therapy based on spiral CT data, n = 58

| Indicator         | n (%)     | Regression percent median,<br>Me [25%; 75%] |
|-------------------|-----------|---------------------------------------------|
| Progression       | 0         | -                                           |
| Stabile disease   | 44 (75.9) | 16 [5.5; 23.5]                              |
| Partial response  | 14 (24.1) | 35.5 [31; 43]                               |
| Complete response | 0         | -                                           |
