# Supplementary material for: Efficacy of Neoadjuvant Targeted Therapy in Treatment of Patients with Localised Clear-Cell Renal Cell Carcinoma
Source: Hindawi journal article supplement (doi:10.1155/2021/6674637), 2021-04-30
Supplement: f1 [file 6674637.f1.zip]

Table 3 - RFPV before and after neoadjuvant TT in the main group according to the bolus contrast enhancement spiral CT results, n = 58

| Indicator                  | Main group<br>before TT<br>n = 58 | Main group<br>after TT<br>n = 58 | Statistical<br>evaluation           |
|----------------------------|-----------------------------------|----------------------------------|-------------------------------------|
| RFPV,<br>% (Me [25%; 75%]) | 62 [57; 77]                       | 83 [70; 90]                      | Mann-Whitney<br>U Test;<br>p <0.001 |
