# Supplementary material for: Efficacy of Neoadjuvant Targeted Therapy in Treatment of Patients with Localised Clear-Cell Renal Cell Carcinoma
Source: Hindawi journal article supplement (doi:10.1155/2021/6674637), 2021-04-30
Supplement: f1 [file 6674637.f1.zip]

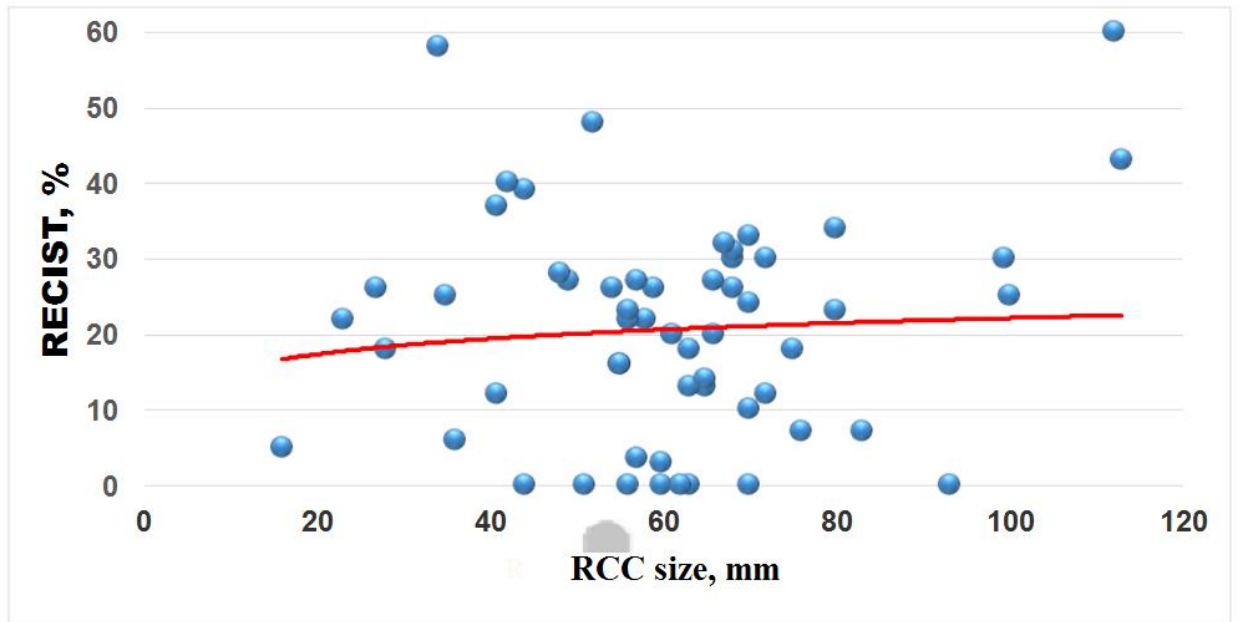

Figure 5 - Dependence of the localized RCC regression level on the size of the primary tumor in the kidney,  $n = 58$
