# Supplementary material for: Efficacy of Neoadjuvant Targeted Therapy in Treatment of Patients with Localised Clear-Cell Renal Cell Carcinoma
Source: Hindawi journal article supplement (doi:10.1155/2021/6674637), 2021-04-30
Supplement: f1 [file 6674637.f1.zip]

Table 5 - Dependence of regression level and tumor stage, n = 58

| T-stage (according to TNM classification) | RCC regression, %<br>M ± SD (95 % CI) | Statistical evaluation                                  |
|-------------------------------------------|---------------------------------------|---------------------------------------------------------|
| T <sub>1a</sub> , n = 7                   | 22.9 + 17.7 (6.5 - 39.2)              | ANOVA:<br>$\eta^2 = 0.01$ ;<br>power = 0.1;<br>p = 0.72 |
| T <sub>1b</sub> , n = 35                  | 18.8 + 13.2 (14.3 - 23.2)             |                                                         |
| T <sub>2</sub> , n = 16                   | 22.3 + 16.3 (13.6 - 30.9)             |                                                         |
