# Supplementary material for: Efficacy of Neoadjuvant Targeted Therapy in Treatment of Patients with Localised Clear-Cell Renal Cell Carcinoma
Source: Hindawi journal article supplement (doi:10.1155/2021/6674637), 2021-04-30
Supplement: f1 [file 6674637.f1.zip]

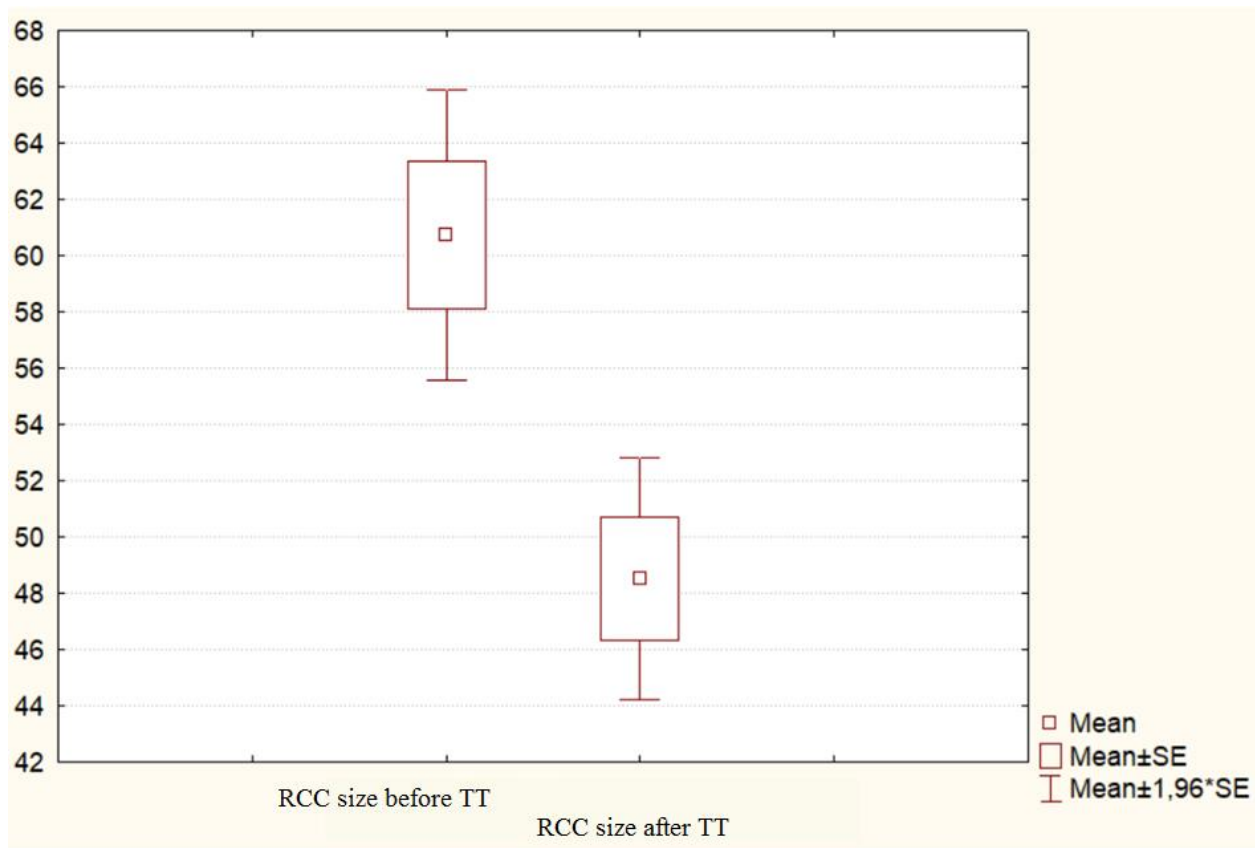

Figure 3 - Comparative assessment of the mean size of localized RCC before and after neoadjuvant TT based on spiral CT data, n = 58
